# Supplementary material for: Geographic Variability of Biologically Active Compounds, Antioxidant Activity and Physico-Chemical Properties in Wild Bilberries (Vaccinium myrtillus L.)
Source: MDPI journal article supplement (doi:10.3390/antiox11030588), 2022-03-19
Supplement: s1 [file s1]

Supplementary material:

## Geographic variability of biologically active compounds, antioxidant activity and physico-chemical properties in wild bilberries (*Vaccinium myrtillus* L.)

Dalia Urbonaviciene <sup>1,\*</sup>, Ramune Bobinaite <sup>1</sup>, Pranas Viskelis <sup>1</sup>, Ceslovas Bobinas <sup>1</sup>, Aistis Petruskevicius <sup>1</sup>, Linards Klavins<sup>2</sup> and Jonas Viskelis <sup>1</sup>

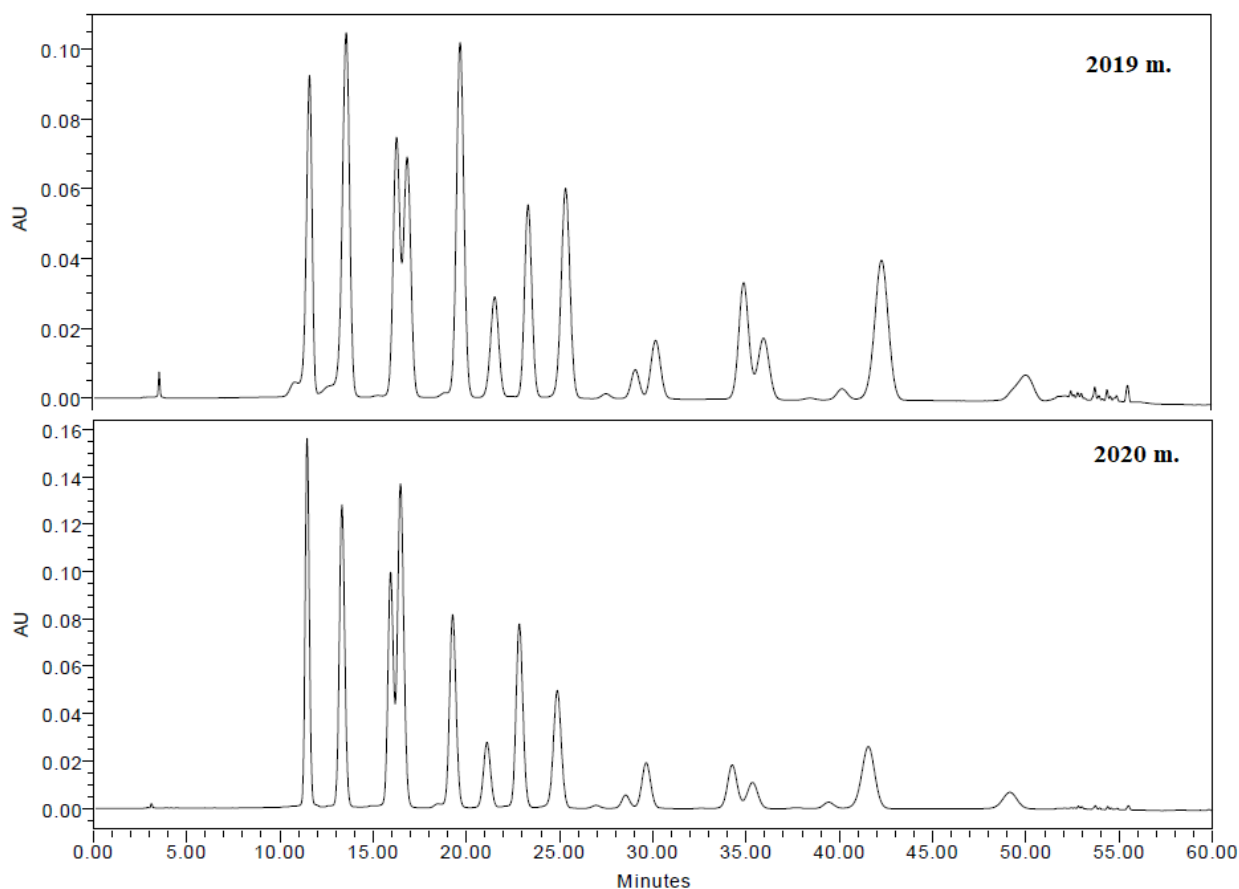

**Figure S1.** HPLC-PDA chromatogram ( $\lambda = 520$  nm) of the wild bilberry B2 (*Vaccinium myrtillus* L.) samples extracts of 2019 and 2020.
